# Supplementary material for: Tethering of rhBMP-2 upon calcium phosphate cement via alendronate/heparin for localized, sustained and enhanced osteoactivity
Source: Royal Society of Chemistry journal article supplement (doi:10.1039/c7ra01908d), 2017-01-01
Supplement: c7ra01908d1.pdf [file c7ra01908d1.pdf]

## Supporting Information

### **Tethering of rhBMP-2 upon calcium phosphate cement via Alendronate/Heparin for localized, sustained and enhanced osteactivity**

Jiaoyang Zhu,<sup>ab</sup> Baolin Huang,<sup>ab</sup> Sai Ding,<sup>ab</sup> Wenjing Zhang<sup>a</sup>, Xiaoyu Ma,<sup>b</sup> Haoyi Niu,<sup>b</sup> Yuan Yuan<sup>\*ab</sup> and Changsheng Liu<sup>\*ab</sup>

<sup>a</sup> Key Laboratory for Ultrafine Materials of Ministry of Education, East China University of Science and Technology, Shanghai 200237, PR China

<sup>b</sup> Engineering Research Center for Biomedical Materials of Ministry of Education, East China University of Science and Technology, Shanghai 200237, PR China

Email Address: yyuan@ecust.edu.cn (Yuan Yuan); liucs@ecust.edu.cn (Changsheng Liu).

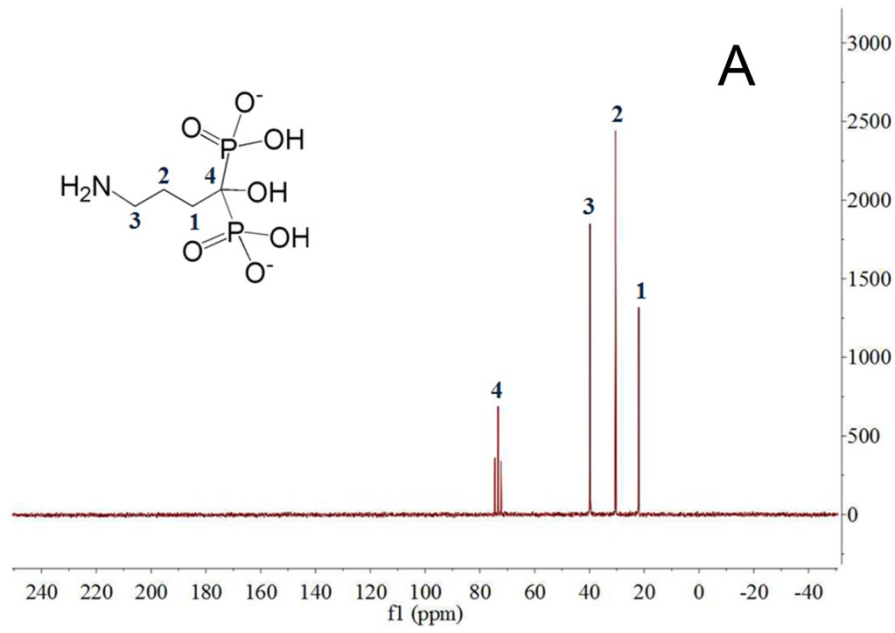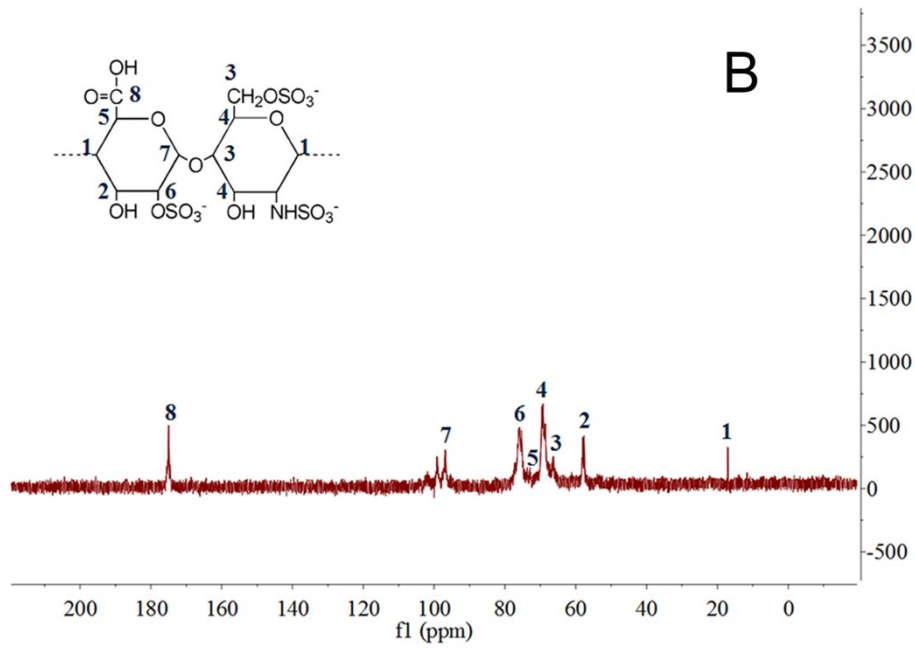

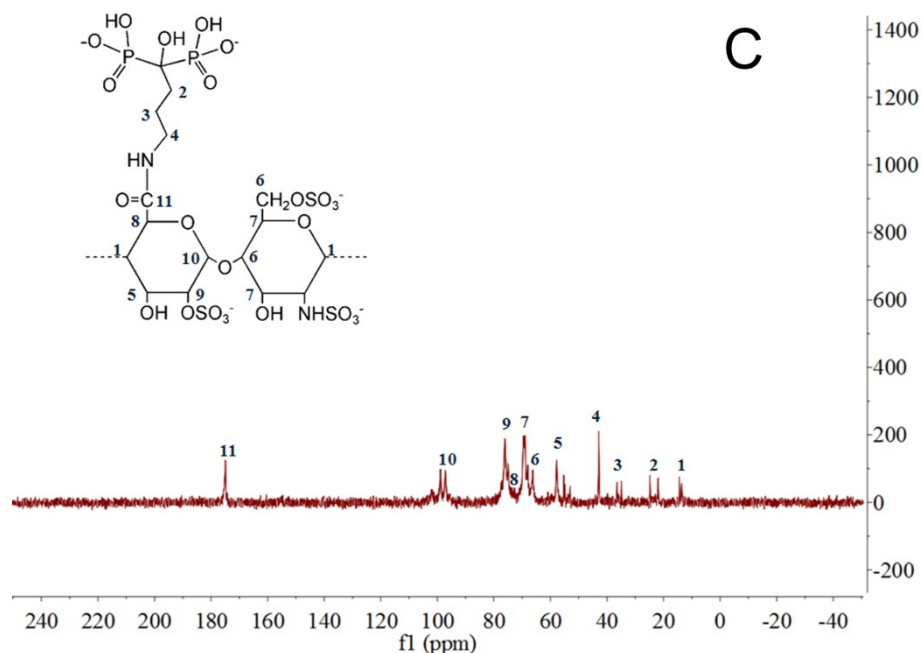

**Fig. S1**  $^{13}\text{C}$  NMR spectra of Alen (A), Hep (B) and AH (C).  $^{13}\text{C}$  NMR analysis was used to confirm the successful synthesis of AH and to demonstrate the molecular structure of Alen, Hep and AH. The peak at 174.4 ppm (Fig. S1 C, peak 11) represented the covalent attachment of Alen onto the Hep via amide group. Additionally, other peaks could match to the corresponding C of the molecules. In the spectrum of AH, the characterized peaks corresponding to either Alen or Hep could be found.

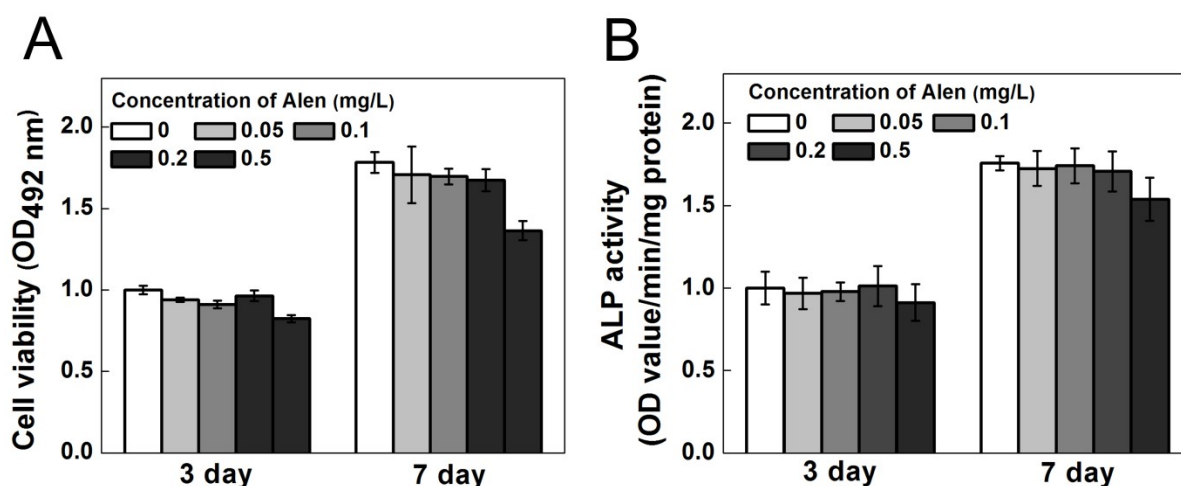

**Fig. S2.** Cell viability (A) and ALP activity (B) of C2C12 under the different concentration of Alen after 3 and 7 days. There was no significant difference exhibited in cell viability and ALP activity below the concentration of 0.2 mg/mL.
